# Supplementary figures and images for: The preparation of functionalized graphene oxide for targeted intracellular delivery of siRNA
Source: Royal Society of Chemistry journal article supplement (doi:10.1039/c2jm14718a), 2012-01-01

## Supporting Information

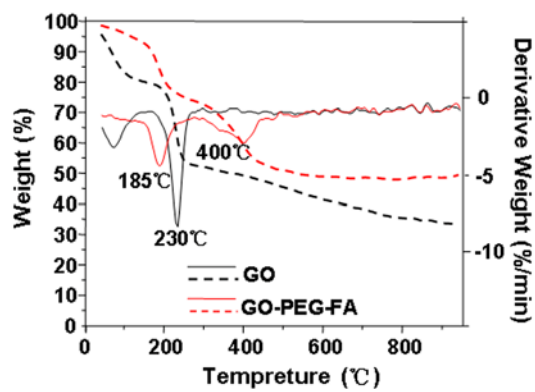

Fig S1. TGA and DTG curves of GO and GO-PEG-FA

Supplement: c2jm14718a.pdf [file c2jm14718a.pdf]
